# Supplementary material for: World Health Organization (WHO) COVID-19 Database: Who Needs It?
Source: Preprints.org preprint supplement (doi:10.20944/preprints202007.0051.v2), 2020-08-02
Supplement: Supplementary file 1 [file supplementary]

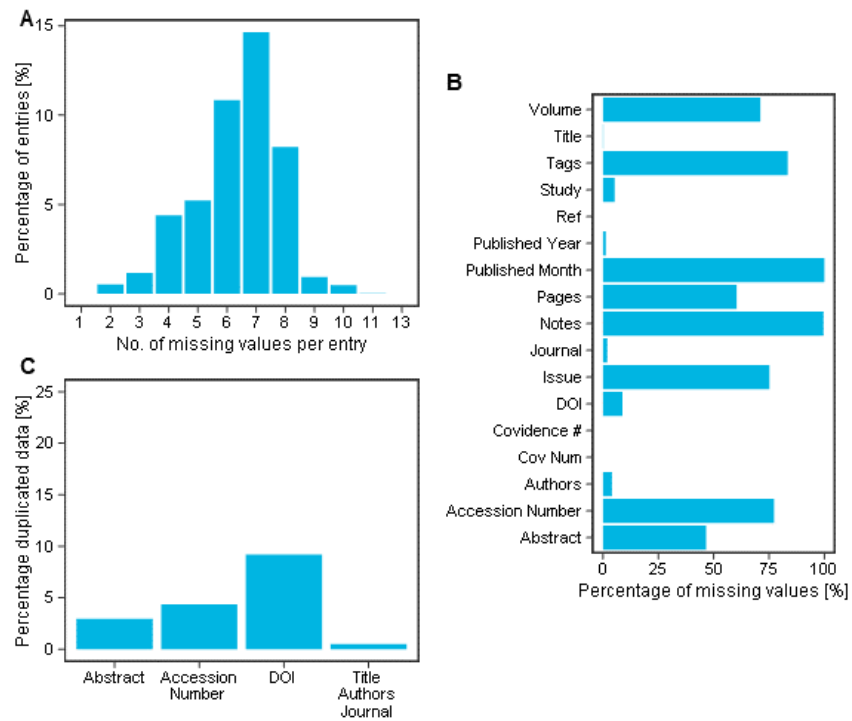

**Supplement 2. Missing and duplicate values in WHO COVID-19 database (acquired on 2020-05-19).** **A)** Percentage of entries with indicated number of missing values. **B)** Percentage of missing values per category (variable). **C)** Percentage of duplicated data per category after missing values are excluded.
