# Supplementary material for: World Health Organization (WHO) COVID-19 Database: Who Needs It?
Source: Preprints.org preprint supplement (doi:10.20944/preprints202007.0051.v2), 2020-08-02
Supplement: Supplementary file 2 [file supplementary]

Archive with 2 entries (2 files):
- Supplement 1.xlsx
- Supplement 2.pdf
